# Supplementary material
Source: publisher figshare collection journal article supplement (https://sage.figshare.com/ndownloader/files/18667421)
Supplement: Supplementary file 1 [file 18667421]

**Appendix Table A1:** Google news searches, Club and tournament specific

| Tournament specific searches | Club Specific Searches |                 |                  |               |              |
|------------------------------|------------------------|-----------------|------------------|---------------|--------------|
| Rugby World Cup              | Leinster               | Agen            | Saracens         | Blues         | New Zealand  |
| 6 Nations                    | Munster                | Bordeaux Begles | Exeter           | Brumbies      | Australia    |
| Rugby Championship           | Connacht               | Brive           | Northampton      | Bulls         | South Africa |
| Pro 12                       | Ulster                 | Castres         | Leicester Tigers | Cheetahs      | England      |
| Top 14                       | Cardiff Blues          | Clermot         | Bath             | Chiefs        | Ireland      |
| Aviva English Premiership    | Newport Gwent Dragons  | Grenoble        | Worcester        | Crusaders     | Scotland     |
| Super Rugby                  | Llanelli Scarlets      | La Rochelle     | Harlequins       | Western Force | Wales        |
|                              | Ospreys                | Montpellier     | Sale             | Highlanders   | France       |
|                              | Edinburgh              | Racing Metro    | Wasps            | Hurricanes    | Italy        |
|                              | Glasgow Warriors       | Toulon          | Gloucester       | Lions         | Japan        |
|                              | Zebre                  | Pau             | London Irish     | Rebels        | Samoa        |
|                              | Treviso                | Stade Francais  | Newcastle        | Reds          | tonga        |
|                              |                        | Toulouse        |                  | Sharks        | Fiji         |
|                              |                        | Oyonnax         |                  | Stormers      | USA          |
|                              |                        |                 |                  | Waratahs      | Canada       |
|                              |                        |                 |                  |               | Argentina    |
|                              |                        |                 |                  |               | Uruguay      |
|                              |                        |                 |                  |               | Romania      |
|                              |                        |                 |                  |               | Georgia      |
|                              |                        |                 |                  |               | Namibia      |

**Appendix Table A2:** Video analysis questionnaire used to describe shoulder dislocation/  
instability injury circumstances

| Game specific variables |                                                      | Injury Specific Variables      |                                                                                                                               |
|-------------------------|------------------------------------------------------|--------------------------------|-------------------------------------------------------------------------------------------------------------------------------|
| Injured Shoulder        |                                                      | Injury Mechanism               | Try Scorer<br>Tackler<br>Direct Contact<br>Other:                                                                             |
| Position                |                                                      |                                |                                                                                                                               |
| Ball possession         | Yes<br>No                                            |                                |                                                                                                                               |
| Time in Match           |                                                      | Direction travelling           | Attacking try line<br>Own try line<br>Across field                                                                            |
| Pitch Location          | Defensive third<br>Offensive third<br>Midfield third | Body Position                  | Prone<br>Up Right<br>On side                                                                                                  |
| Game Situation          | Tackler<br>Tackled<br>Open Play<br>Set Piece         | Arm at initiation of injury    | Flexion<br>Extension<br>Neutral<br>Abduction<br>Adduction<br>Neutral<br>External rotation<br>Internal rotation<br>Neutral     |
| Type of Play            | Tackle<br>Open Play<br>Scrum<br>Ruck<br>Foul Play    | How did arm move during injury | Flexion<br>Extension<br>Neither<br>Abduction<br>Adduction<br>Neither<br>External rotation<br>Internal rotation<br>Neither     |
|                         |                                                      | Direction of force             | Superior<br>Inferior<br>Neither<br>Anterior<br>Posterior<br>Neither<br>Medial (compressive)<br>Lateral (wrenching)<br>Neither |

**Appendix Table A3.** Rugby-specific variables recorded for 39 shoulder dislocation cases

analysed using systematic video analysis

| Case                              | Ball carrier | Field location  | Tackler/tackle/open play/ set piece | Contest type | Position | Time in match | Injured shoulder |
|-----------------------------------|--------------|-----------------|-------------------------------------|--------------|----------|---------------|------------------|
| <b>Tackler</b>                    |              |                 |                                     |              |          |               |                  |
| #1                                | No           | Defensive third | Tackler                             | Tackle       | Forward  | 1-20          | Left             |
| #2                                | No           | Midfield zone   | Tackler                             | Tackle       | Forward  | 21-40         | Right            |
| #3                                | No           | Midfield zone   | Tackler                             | Foul play    | Back     | 61-80         | Right            |
| #4                                | Yes          | Defensive third | Open play                           | Open play    | Back     | 61-80         | Right            |
| #5                                | No           | Defensive third | Tackler                             | Tackle       | Forward  | 1-20          | Right            |
| #6                                | No           | Defensive third | Tackler                             | Tackle       | Back     | 61-80         | Right            |
| #7                                | No           | Defensive third | Tackler                             | Tackle       | Forward  | 41-60         | Left             |
| #8                                | No           | Midfield zone   | Tackler                             | Tackle       | Back     | 41-60         | Left             |
| #9                                | No           | Defensive third | Tackler                             | Tackle       | Forward  | 61-80         | Right            |
| <b>Diving tackler/ Try scorer</b> |              |                 |                                     |              |          |               |                  |
| #10                               | No           | Defensive third | Open play                           | Open play    | Back     | 21-40         | Left             |
| #11                               | No           | Defensive third | Open play                           | Open play    | Forward  | 21-40         | Left             |
| #12                               | No           | Midfield zone   | Tackler                             | Tackle       | Back     | 1-20          | Left             |
| #13                               | No           | Midfield zone   | Tackler                             | Tackle       | Back     | 61-80         | Right            |
| #14                               | No           | Defensive third | Tackler                             | Tackle       | Forward  | 61-80         | Left             |
| #15                               | Yes          | Defensive third | Tackled                             | Tackle       | Back     | 21-40         | Left             |
| #16                               | No           | Midfield zone   | Open play                           | Open play    | Forward  | 41-60         | Left             |
| #17                               | No           | Midfield zone   | Tackler                             | Tackle       | Back     | 61-80         | Left             |
| #18                               | No           | Midfield zone   | Tackler                             | Tackle       | Back     | 21-40         | Left             |
| <b>Direct Contact</b>             |              |                 |                                     |              |          |               |                  |
| #19                               | Yes          | Midfield zone   | Tackled                             | Tackle       | Back     | 1-20          | Right            |
| #20                               | Yes          | Midfield zone   | Tackled                             | Tackle       | Back     | 21-40         | Right            |
| #21                               | No           | Midfield zone   | Open play                           | Open play    | Back     | 61-80         | Right            |
| #22                               | Yes          | Midfield zone   | Tackled                             | Tackle       | Back     | 1-20          | Left             |
| #23                               | No           | Defensive third | Open play                           | Open play    | Forward  | 21-40         | Left             |
| #24                               | No           | Midfield zone   | Tackler                             | Tackle       | Back     | 21-40         | Left             |
| #25                               | No           | Defensive third | Tackler                             | Tackle       | Forward  | 41-60         | Left             |
| #26                               | No           | Midfield zone   | Open play                           | Rucking      | Back     | 41-60         | Right            |
| <b>Poach position</b>             |              |                 |                                     |              |          |               |                  |
| #27                               | No           | Offensive third | Open play                           | Rucking      | Back     | 61-80         | Right            |
| #28                               | No           | Offensive third | Open play                           | Rucking      | Forward  | 41-60         | Left             |
| #29                               | No           | Offensive third | Open play                           | Rucking      | Forward  | 1-20          | Left             |
| #30                               | No           | Midfield zone   | Open play                           | Rucking      | Back     | 21-40         | Left             |
| #31                               | No           | Midfield zone   | Open play                           | Rucking      | Forward  | 1-20          | Left             |
| #32                               | No           | Midfield zone   | Open play                           | Rucking      | Forward  | 61-80         | Right            |
| #33                               | No           | Midfield zone   | Open play                           | Rucking      | Forward  | 61-80         | Right            |
| <b>Other</b>                      |              |                 |                                     |              |          |               |                  |
| #34                               | No           | Offensive third | Set piece                           | Scrum        | Forward  | 21-40         | Left             |
| #35                               | No           | Midfield zone   | Open play                           | Rucking      | Forward  | 61-80         | Right            |
| #36                               | No           | Defensive third | Open play                           | Rucking      | Forward  | 21-40         | Right            |
| #37                               | No           | Offensive third | Set piece                           | Scrum        | Forward  | 61-80         | Left             |
| #38                               | Yes          | Midfield zone   | Tackled                             | Tackle       | Forward  | 41-60         | Left             |
| #39                               | No           | Midfield zone   | Set piece                           | Scrum        | Forward  | 61-80         | Left             |
